# Supplementary material
Source: MDPI journal article supplement (https://www.mdpi.com/2076-0760/8/1/22)
Supplement: s1 [file s1]

## Supplement A

Table A1. CARM management history during the grazing season and fall/winter management (F/W).

| Pasture<br>Name      Ecological site |                   | 2014<br>Grazing          | 2014-<br>15 F/W | 2015<br>Grazing     | 2015-<br>16<br>F/W | 2016<br>Grazing                             | 2016-<br>17 F/W | 2017<br>Grazing                               | 2017-<br>18 F/W                           | 2018<br>Grazing |
|--------------------------------------|-------------------|--------------------------|-----------------|---------------------|--------------------|---------------------------------------------|-----------------|-----------------------------------------------|-------------------------------------------|-----------------|
| Nighthawk                            | Loamy             | rest                     | 80ac<br>burn    | 3; low<br>residual  |                    | rest                                        |                 | 3                                             |                                           | 6               |
| Highway                              | Loamy             | rest                     |                 | 4; low<br>residual  |                    | rest                                        |                 | 4 (only 7<br>days<br>grazing)                 |                                           | rest            |
| Hilltank                             | Loamy             | 7; low<br>residual       |                 | rest                |                    | 5; less<br>residual<br>than<br>usual        |                 | 6; grazed<br>to<br>biomass<br>trigger         |                                           | 5               |
| Crossroads                           | Mixed             | 6                        |                 | rest                |                    | 4                                           |                 | 5                                             |                                           | 4               |
| South                                | Mixed +<br>Shrubs | rest                     |                 | rest                |                    | 3                                           |                 | 7;<br>Minimal<br>grazing<br>due to<br>water   |                                           | 3               |
| Ridgeline                            | Mixed +<br>Shrubs | 4                        |                 | rest                |                    | 1                                           |                 | 9 (only<br>10 days<br>grazing)                |                                           | 7               |
| Head-<br>quarters                    | Mixed+<br>SF      | 3                        |                 | rest                |                    | 7; still<br>high<br>residual                |                 | 2;<br>regrowth<br>after                       | Proposed<br>burn - not<br>implemen<br>ted | 8               |
| Salt Flat                            | Sandy+<br>SF      | 5; high<br>residual      | 80ac<br>burn    | 2; low<br>residual  |                    | rest                                        |                 | 8                                             |                                           | 9               |
| Elm                                  | Sandy+<br>SF      | 1; very high<br>residual |                 | rest                |                    | 2; less<br>residual<br>than<br>usual        |                 | rest                                          | 80ac<br>burn                              | 1               |
| Snowfence                            | Sandy +<br>Shrubs | 2; very high<br>residual |                 | 1; high<br>residual |                    | 6; still<br>high<br>residual<br>off<br>burn | 80ac<br>burn    | 1; low<br>June<br>biomass,<br>but<br>regrowth |                                           | 2               |

SF = Salt Flat ecological site present in portion of pasture

|      |                             |                 |                                   |
|------|-----------------------------|-----------------|-----------------------------------|
| rest | high<br>residual<br>biomass | low<br>residual | Prescri<br>bed<br>burn<br>(acres) |
|------|-----------------------------|-----------------|-----------------------------------|

Table A2: CARM herd management history. “Triggers” are thresholds that indicate a movement of the CARM herd among pastures.

|                                | 2014                                 | 2015                  | 2016        | 2017          | 2018          |
|--------------------------------|--------------------------------------|-----------------------|-------------|---------------|---------------|
| Stocking (# Steers)            | 214                                  | 224                   | 234         | 244           | 280           |
| Pastures Grazed/Rested         | 7/3                                  | 4/6                   | 7/3         | 9/1           | 9/1           |
| Cattle movement triggers       |                                      |                       |             |               |               |
| Minimum veg biomass            | Yes; Not Used                        | Yes; Used             | Yes; Used   | Yes; Used     | Yes; Used     |
| Cattle behavior                | Yes; Not Used                        | Yes; Used             | Yes; Used   | Yes; Not used | Yes; Not used |
| Max days in pasture            | Yes; Used                            | No                    | Yes; Used   | Yes; Used     | Yes; Used     |
| Biomass on burn                | NA                                   | Yes; Used<br>Yes; Not | NA          | NA            | NA            |
| Days in last pasture           | No                                   | Used                  | Yes; Used   | Yes; Used     | Yes; Used     |
| Water availability             | No                                   | No                    | No          | No; Used      | No; Used      |
| Avg/wet year exit thresholds:  |                                      |                       |             |               |               |
| Loamy                          | 300                                  | 300                   | 450         | 450           | 450           |
| Mixed                          | 400                                  | 400                   | 500         | 500           | 500           |
| Sandy                          | 450                                  | 450                   | 550         | 550           | 550           |
| Drought exit thresholds:       |                                      |                       |             |               |               |
| Loamy                          | 300                                  | 300                   | 300         | 300           | 300           |
| Mixed                          | 400                                  | 400                   | 400         | 400           | 400           |
| Sandy                          | 450                                  | 450                   | 450         | 450           | 450           |
| Burn entrance threshold:       |                                      | 350                   |             | No            | No            |
| Max Days setting if used:      | Variable based on grazing calculator | Not Used              | 24          | 21            | 14/21/10      |
| Days in last pasture criteria: |                                      | At least 7            | At least 10 | At least 10   | At least 10   |
